# Supplementary material for: Determination of Alternaria Toxins in Sunflower Oil by Liquid Chromatography Isotope Dilution Tandem Mass Spectrometry
Source: PubMed Central journal article supplement (PMC7180471; doi:10.3390/molecules25071685), 2020-04-07
Supplement: molecules-25-01685-s001.pdf [file molecules-25-01685-s001.pdf]

## Supplementary Materials

*Article*

# Determination of *Alternaria* Toxins in Sunflower Oil by Liquid Chromatography Isotope Dilution Tandem Mass Spectrometry

Ádám Tölgyesi <sup>1,\*</sup>, Luca Kozma <sup>1</sup> and Virender K. Sharma <sup>2,\*</sup>

<sup>1</sup> KERMI department, ÉMI-TÜV SÜD Ltd., Dugonics utca 11, 1043 Budapest, Hungary; kozma.luca@emi-tuv.hu

<sup>2</sup> Program for the Environment and Sustainability, Department of Environmental and Occupational Health, School of Public Health, Texas A&M University, 212 Adriance Lab Rd., 1266 TAMU, College Station, TX 77843, USA

\* Correspondence:tolgyesi.adam@emi-tuv.hu (Á.T.); vsharma@tamu.edu (V.K.S.)

Academic Editor: Ping-Chung Kuo

Received: 27 February 2020; Accepted: 3 April 2020; Published: date

**Table S1.** Existing LC-MS/MS methods for *Alternaria* toxins.

| Compounds               | Matrix                          | Method                                                                        | Isotope dilution | Extraction solvent                    | Clean-up | Analytical limit    | Reference |
|-------------------------|---------------------------------|-------------------------------------------------------------------------------|------------------|---------------------------------------|----------|---------------------|-----------|
| TEA, ALT, AOH, TEN, AME | Tomato                          | LC-ESI-MS/MS, negative ionization, chemical derivatization, C-18 column, pH 3 | No               | MeOH                                  | SPE      | LOQ: 2-20 µg/kg     | [11]      |
| ALT, AOH, AME           | Garlic, dietary supplements     | LC-ESI-MS/MS, positive ionization, C-18 column, pH 3                          | No               | Ethyl acetate/acetic acid (95/5, v/v) | SPE      | LOQ: 6-100 µg/kg    | [12]      |
| AOH, AME                | Wine, beverages                 | LC-ESI-MS/MS, negative ionization, C-18 column, pH 7                          | No               | Not performed                         | SPE      | LOD: 0.01 µg/kg     | [13]      |
| TEA, ALT, AOH, TEN, AME | Beverages, tomato, basil, olive | LC-ESI-MS/MS, polarity switching, C-18 column, pH 7                           | No               | MeOH                                  | SPE      | LOQ: 0.7 - 63 µg/kg | [14]      |
| AOH, AME                | Tangerine                       | LC-ESI-MS/MS, negative ionization, C-18 column, pH 7                          | No               | AcN                                   | SPE      | LOQ: 0.5 µg/kg      | [15]      |

|                               |                                                                 |                                                                                                 |                                           |                                           |               |                          |      |
|-------------------------------|-----------------------------------------------------------------|-------------------------------------------------------------------------------------------------|-------------------------------------------|-------------------------------------------|---------------|--------------------------|------|
| AOH, AME                      | Wine, beverages                                                 | LC-ESI-MS/MS,<br>negative<br>ionization,<br>C-18 column, pH<br>7                                | AOH-d4,<br>AME-d4                         | Not performed                             | SPE           | LOQ: 0.03-<br>0.09 µg/kg | [16] |
| TEA                           | Tomato based<br>foodstuff                                       | LC-ESI-MS/MS,<br>negative<br>ionization,<br>chemical<br>derivatization,<br>C-18 column, pH<br>7 | TEA- <sup>13</sup> C6-<br><sup>15</sup> N | Ethyl acetate                             | SPE           | LOQ: 0.3<br>µg/kg        | [17] |
| TEA                           | Cereals                                                         | LC-ESI-MS/MS,<br>positive<br>ionization,<br>chemical<br>derivatization,<br>C-18 column, pH<br>3 | No                                        | Ethyl acetate                             | Not performed | LOQ: 50<br>µg/kg         | [18] |
| TEA, ALT,<br>AOH, TEN,<br>AME | Cereals<br>method1                                              | LC-ESI-MS/MS<br>polarity<br>switching,<br>HSS-T3 column,<br>pH 3                                | No                                        | AcN + 1% (v/v) acetic acid                | Not performed | LOQ: 2<br>µg/kg          | [8]  |
| TEA, ALT,<br>AOH, TEN,<br>AME | Wine, beverages,<br>cereals<br>method2                          | LC-ESI-MS/MS<br>polarity<br>switching,<br>HSS-T3 column,<br>pH 3                                | No                                        | AcN/water/formic acid, 84/16/1<br>(v/v/v) | Not performed | LOQ: 1.0-<br>5.0 µg/kg   | [8]  |
| TEA, ALT,<br>AOH, TEN,<br>AME | Sunflower oil,<br>sunflower seeds,<br>tomato based<br>foodstuff | LC-ESI-MS/MS<br>polarity<br>switching,                                                          | No                                        | AcN/water/formic acid, 84/16/1<br>(v/v/v) | Not performed | LOQ: 1.5-<br>5.0 µg/kg   | [9]  |

|                               |                                               |                                                                    |                                                                 |                                                      |               |                           |      |
|-------------------------------|-----------------------------------------------|--------------------------------------------------------------------|-----------------------------------------------------------------|------------------------------------------------------|---------------|---------------------------|------|
|                               |                                               | HSS-T3 column,<br>pH 3                                             |                                                                 |                                                      |               |                           |      |
| TEA, ALT,<br>AOH, TEN,<br>AME | Fig, sunflower<br>seeds                       | LC-ESI-MS/MS<br>polarity<br>switching,<br>HSS-T3 column,<br>pH 3   | No                                                              | AcN + 1% (v/v) acetic acid                           | Not performed | LOQ: 1.5-<br>5.0 µg/kg    | [9]  |
| TEA, ALT,<br>AOH, TEN,<br>AME | Tomato, cereals                               | LC-ESI-MS/MS,<br>negative<br>ionization,<br>C-18 column, pH<br>8.7 | No                                                              | MeOH/water/acetic acid, 79/20/1<br>(v/v/v)<br>hexane | Not performed | LOQ: 0.06 -<br>3.6 µg/kg  | [19] |
| TEA, ALT,<br>AOH, AME         | Spices, herbs                                 | LC-ESI-MS/MS,<br>negative<br>ionization,<br>C-18 column, pH<br>8   | No                                                              | AcN/water/acetic acid, 49/50/1<br>(v/v/v)            | Not performed | LOQ: 4.2 -<br>20.4 µg/kg  | [20] |
| TEA, AOH,<br>TEN, AME         | Cereals, tomato<br>and fruit based<br>samples | LC-ESI-MS/MS,<br>negative<br>ionization,<br>C-18 column, pH<br>7   | TEA- <sup>13</sup> C6-<br><sup>15</sup> N,<br>AOH-d4,<br>AME-d4 | ACN/water, 84/16 (v/v/v) + 1,3%<br>formic acid       | SPE           | LOQ: 0.16 -<br>5.56 µg/kg | [21] |
| TEA, AOH,<br>TEN, AME         | tomato and fruit<br>based samples             | LC-ESI-MS/MS<br>positive<br>ionization,<br>phenyl-hexyl<br>column  | No                                                              | AcN + 1% (v/v) formic acid                           | QuEChERS      | LOQ: 4.0 -<br>160 µg/kg   | [22] |
| TEA, AOH,<br>TEN, AME         | Vegetables, fruits                            | LC-ESI-MS/MS<br>polarity<br>switching,<br>C-18 column, pH<br>7     | No                                                              | AcN + 1% (v/v) formic acid                           | QuEChERS      | LOQ: 0.2 -<br>10 µg/kg    | [23] |

|                                          |                                                          |                                                        |                                                |                                                                |               |                       |      |
|------------------------------------------|----------------------------------------------------------|--------------------------------------------------------|------------------------------------------------|----------------------------------------------------------------|---------------|-----------------------|------|
| TEA, AOH, TEN, AME                       | Korean barley grain samples, rice culture medium extract | LC-ESI-MS/MS, positive ionization, C-8 column, pH 3    | No                                             | MeOH                                                           | Not performed | LOQ: 0.25 - 8.0 µg/kg | [24] |
| ALT, AOH, AME,                           | Sorghum                                                  | LC-ESI-MS/MS, positive ionization, C-18 column, pH 3   | No                                             | MeOH/ethyl acetate/water, 70/20/10, (v/v/v)                    | SPE           | LOQ: 6.0 – 25 µg/kg   | [25] |
| TEA, ALT, AOH, TEN, AME, conjugates      | Tomato, fruit, vegetables                                | LC-ESI-MS/MS, polarity switching, HSS T3 column, pH 3  | TEA- <sup>13</sup> C6- <sup>15</sup> N, AME-d4 | AcN                                                            | QuEChERS      | LOQ: 1.1 – 61.5 µg/kg | [26] |
| TEA, ALT, AOH, TEN, AME, conjugates      | cereal-based foodstuffs                                  | LC-ESI-MS/MS, polarity switching, HSS T3 column, pH 3  | TEA- <sup>13</sup> C6- <sup>15</sup> N, AME-d4 | AcN/water/acetic acid, 79/19.5/1.5, (v/v/v)                    | Not performed | LOQ: 0.9 – 8.3 µg/kg  | [27] |
| TEA, ALT, AOH, TEN, AME and other toxins | wine, vegetable juices and fruit juices                  | LC-ESI-MS/MS, negative ionization, C-18 column, pH 8.8 | No                                             | Dilution with sodium hydrogen carbonate buffer, pH 8.4         | SPE           | LOQ: 0.4 – 3.1 µg/kg  | [28] |
| AOH, AME                                 | Foodstuffs                                               | LC-ESI-MS/MS, negative ionization, C-18 column, pH 8.8 | AOH-d4, AME-d4                                 | AcN                                                            | MIP           | LOQ: 0.6 - 1.8 µg/kg  | [29] |
| TEA, ALT, AOH, TEN, AME and other toxins | Tomato products, bakery products, sunflower seeds,       | LC-ESI-MS/MS, polarity switching,                      | No                                             | AcN/water/formic acid, ratio depends on the matrix of interest | Not performed | LOQ: 0.1 - 110 µg/kg  | [10] |

|                                          |                                  |                                                              |                                                                                                                       |                                         |                                          |                      |               |  |
|------------------------------------------|----------------------------------|--------------------------------------------------------------|-----------------------------------------------------------------------------------------------------------------------|-----------------------------------------|------------------------------------------|----------------------|---------------|--|
|                                          | fruit juices, and vegetable oils | modified C-18 column, pH 3                                   |                                                                                                                       |                                         |                                          |                      |               |  |
| AOH, TEN, AME                            | Tomato, tomato-based products    | LC-ESI-MS/MS, positive ionization, C-18 column, pH 3         | No                                                                                                                    | AcN                                     | Dispersive liquid-liquid microextraction | LOQ: 1.8 - 3.5 µg/kg | [30]          |  |
| TEA, AOH, TEN, AME                       | Tomato, ketchup, fruit juices    | LC-ESI-MS/MS, negative ionization, C-18 column, pH 8.8       | No                                                                                                                    | AcN/water/MeOH, 45/45/10, (v/v/v)       | SPE                                      | LOQ: 0.3 - 20 µg/kg  | [31]          |  |
| TEA, ALT, AOH, TEN, AME and other toxins | Dried fruits                     | LC-ESI-MS/MS, polarity switching, modified C-18 column, pH 7 | No                                                                                                                    | AcN                                     | SPE                                      | LOQ: 0.1 - 5 µg/kg   | [32]          |  |
| TEA, AOH, TEN, AME                       | Jujube                           | LC-ESI-MS/MS, positive ionization, C-18 column, pH 3         | No                                                                                                                    | AcN + 1% (v/v) acetic acid              | QuEChERS                                 | LOQ: 0.5 - 0.9 µg/kg | [33]          |  |
| TEA, AOH, TEN, AME                       | <i>Pennisetum glaucum</i>        | LC-ESI-MS/MS, polarity switching, C-18 column, pH 3          | No                                                                                                                    | AcN/water/acetic acid, 79/20/1, (v/v/v) | Not performed                            | No data              | [34]          |  |
| TEA, ALT, AOH, TEN, AME                  | Sunflower oil                    | LC-APCI-MS/MS, negative ionization, C-18 column, pH 8.8      | TEA- <sup>13</sup> C <sub>2</sub> , ALT-d <sub>6</sub> , AOH-d <sub>3</sub> , TEN-d <sub>3</sub> , AME-d <sub>3</sub> | MeOH/water, 80/20 (v/v), hexane         | Not performed                            | LOQ: 2.5 – 10 µg/kg  | Present study |  |

TEA: tenuazonic acid; ALT: altenuene; AOH: alternariol; TEN: tentoxin; AME: alternariol monomethyl ether; AcN: acetonitrile; MeOH: methanol; MIP: molecularly imprinted polymer; LOQ: limit of quantification; LOD: limit of detection; SPE: solid phase extraction; QuEChERS: quick, easy, cheap, effective, rugged, and safe.
